# Supplementary material for: Utility of telemedicine in pediatric rheumatology during the COVID-19 pandemic
Source: Research Square preprint supplement (doi:10.21203/rs.3.rs-387993/v1), 2021-04-12
Supplement: Supplementary file 1 [file 9544cc88b6b5ba286965015b.docx]

**Supplemental Table 3:** Comparison of encounters between telehealth and office visits.

| Table 2 | Office visits March 2019-March 2020 | Telehealth visits April 2020-June 2020 | z-test to compare two proportion |
| --- | --- | --- | --- |
| Number of patients (N) | 415 | 75 |  |
| % new patients | 83% | 60% | <0.0001 |
| New patient visits < 2weeks | 61% | 69.30% | 0.1723 |
| No show rate | 6% | 6.70% | 0.2525 |
